# Supplementary material for: Efficacy of a transdiagnostic Internet prevention approach in adolescents (EMPATIA study): study protocol of a randomized controlled trial
Source: PubMed Central journal article supplement — Trials. 2024 Aug 8;25:530. doi: 10.1186/s13063-024-08241-3 (PMC11308397; doi:10.1186/s13063-024-08241-3), 2024-08-08
Supplement: 13063_2024_8241_MOESM1_ESM.pdf [file 13063_2024_8241_MOESM1_ESM.pdf]

| <b>Subclinical Cut-Off Scores</b>    |                                                                                                                                                                                      |                                         |                   |
|--------------------------------------|--------------------------------------------------------------------------------------------------------------------------------------------------------------------------------------|-----------------------------------------|-------------------|
| <b>Domain</b>                        | <b>Instrument</b>                                                                                                                                                                    | <b>Cut-Off</b>                          | <b>References</b> |
| Depression                           | Patient Health Questionnaire-9 for Adolescents (PHQ-A)                                                                                                                               | 5≤/27                                   | [1]               |
| Bipolar                              | Altman Self-Rating Mania Scale, Child version (ASRM)                                                                                                                                 | 6≤/20                                   | [2–4]             |
| Anxiety                              | Generalized Anxiety Disorder 7 (GAD-7)                                                                                                                                               | 5≤/21                                   | [5]               |
| Obsessive-compulsive disorder        | Obsessive Compulsive Disorder Scale (SOCS)                                                                                                                                           | 6≤/14                                   | [6,7]             |
| Psychotic-like experiences           | Community Assessment of Psychic Experiences - Positive (CAPE-P15)                                                                                                                    | 1.47≤/45                                | [8,9]             |
| Alcohol/Substance abuse              | CRAFFTd                                                                                                                                                                              | 2≤/6                                    | [10]              |
| Eating behavior                      | Eating Disorder Examination-Questionnaire adapted for children (ChEDE-Q8)                                                                                                            | 2.38≤/6                                 | [12]              |
| Conduct disorder                     | Strength and Difficulties Questionnaire, self-report (SDQ-S), subscale conduct disorders                                                                                             | 4≤/10                                   | [13,14]           |
| Non-suicidal self-injurious behavior | Screening questions (frequency, expectation, associated characteristics), Diagnostic Interview for Mental Disorders in children and adolescents, Kinder-DIPS, Additional module NSSV | Item 1 (yes)<br>Item 2 (5 or more days) | [15]              |

## References

1. Johnson JG, Harris ES, Spitzer RL, Williams JBW. The patient health questionnaire for adolescents. *Journal of Adolescent Health*. 2002;30(3):196–204.
2. Altman E, Hedeker D, Peterson JL, Davis JM. A comparative evaluation of three self-rating scales for acute mania. *Biological Psychiatry*. 2001;50(6):468–71.
3. Haussleiter IS, Lorek S, Zeschel E, Mattausch S, Meyers M, Juckel G. At-risk symptoms of bipolar disorder in a university student cohort. *Psychiatry Research*. 2018;265:324–33.
4. Meyer TD, Crist N, La Rosa N, Ye B, Soares JC, Bauer IE. Are existing self-ratings of acute manic symptoms in adults reliable and valid?—A systematic review. *Bipolar Disorders*. 2020;22(6):558–68.
5. Löwe B, Decker O, Müller S, Brähler E, Schellberg D, Herzog W, et al. Validation and Standardization of the Generalized Anxiety Disorder Screener (GAD-7) in the General Population. *Medical Care*. 2008;46(3):266–74.
6. Piqueras JA, Rodríguez-Jiménez T, Ortiz AG, Moreno E, Lázaro L, Godoy A. Validation of the Short Obsessive–Compulsive Disorder Screener (SOCS) in children and adolescents. *BJPsych open*. 2015;1(1):21–6.
7. Zijlmans J, Marhe R, van der Ende J, Verhulst FC, Popma A, Tiemeier H, et al. Children with Obsessive–Compulsive Symptomology in the General Population: Different Subtypes? *Journal of Developmental & Behavioral Pediatrics*. 2017;38(7):476.
8. Capra C, Kavanagh DJ, Hides L, Scott J. Brief screening for psychosis-like experiences. *Schizophrenia Research*. 2013;149(1–3):104–7.

9. Knight C, Stochl J, Sonesson E, Russo DA, Jones PB, Perez J. Revisiting CAPE-P15 cut-off values to increase sensitivity for detecting psychotic experiences in primary care. *Schizophrenia Research*. 2020;216:507–10.
10. Tossmann P, Kasten L, Lang P, Strüber E. Bestimmung der konkurrenten Validität des CRAFFT-d: Ein Screeninginstrument für problematischen Alkoholkonsum bei Jugendlichen. *Zeitschrift für Kinder- und Jugendpsychiatrie und Psychotherapie*. 2009;37(5):451–9.
11. Kliem S, Schmidt R, Vogel M, Hiemisch A, Kiess W, Hilbert A. An 8-item short form of the Eating Disorder Examination-Questionnaire adapted for children (ChEDE-Q8). *International Journal of Eating Disorders*. 2017;50(6):679–86.
12. Becker A, Wang B, Kunze B, Otto C, Schlack R, Hölling H, et al. Normative Data of the Self-Report Version of the German Strengths and Difficulties Questionnaire in an Epidemiological Setting. *Zeitschrift für Kinder- und Jugendpsychiatrie und Psychotherapie*. 2018 Nov 1;46(6):523–33.
13. Goodman R. Psychometric Properties of the Strengths and Difficulties Questionnaire. *Journal of the American Academy of Child & Adolescent Psychiatry*. 2001 Nov;40(11):1337–45.
14. In-Albon T, Kraus L. Nichtsuizidale Selbstverletzungen [Non-suicidal self-injury]. Universität Koblenz-Landau, Klinische Psychologie und Psychotherapie des Kindes- und Jugendalters. 2017.
