# Supplementary material for: Efficacy of a transdiagnostic Internet prevention approach in adolescents (EMPATIA study): study protocol of a randomized controlled trial
Source: PubMed Central journal article supplement — Trials. 2024 Aug 8;25:530. doi: 10.1186/s13063-024-08241-3 (PMC11308397; doi:10.1186/s13063-024-08241-3), 2024-08-08
Supplement: 13063_2024_8241_MOESM2_ESM.pdf [file 13063_2024_8241_MOESM2_ESM.pdf]

*Translation of original ethical approval – for original version see below starting on page 8.*

201.251473

REGISTERED LETTER

Stefanie Schmidt

Institute of Psychology, University of Bern

Fabrikstrasse 8

3012 Bern

Bern, 22<sup>nd</sup> of August 2022

## **PROVISION**

**Subject: Authorization of a clinical trial<sup>1</sup> with medical devices**

Our reference (Reference to original application number): **102676067**

Identification of the clinical trial

- Title: Randomized Controlled Trial on the Efficacy of a Transdiagnostic Online-Prevention Approach in Adolescents (EMPATIA)
- Sponsor: Institute of Psychology, University of Bern
- Reference number Swissmedic: 10001035
- Reference number Ethics Committee: 2022-D0036
- Reference number EUDAMED: CIV-22-04-039291

Ladies and Gentlemen

### **1. Considerations**

Swissmedic makes the decision to authorize the trial in accordance with Article 54 of the Federal Act on Medicinal Products and Medical Devices (TPA; SR 812.21), the positive vote of the responsible ethics committee (see Annex) and the confirmations of submission dated 10.08.2022 and 22.08.2022 and the documents and information received by Swissmedic up to and including 10. 08.2022, in particular

- Clinical investigation plan (CIP) version 2 (09.06.2022)
- Data collection form (CRF) version 3 (24.06.2022)
- Investigator's brochure version 5 (05.08.2022)
- Patient information version 3 (24.06.2022)

<sup>1</sup> This term includes the following: Clinical trials with medical devices, interventional performance studies with IVDs, combined clinical trials with medical devices and medicinal products

## Fee

The fee is set in accordance with the Ordinance of the Swiss Agency for Therapeutic Products on its fees (GebV-Swissmedic; SR 812.214.5). The flat-rate fee is CHF 5000. Additional costs were incurred in the authorization procedure due to inadequate content or changes to documents. This is not covered by the flat-rate fee provided for in the GebV-Swissmedic. The additional expenditure amounts to 2 hours and will be invoiced at a fee of CHF 200 per hour based on the GebV-Swissmedic. The total amount for the flat-rate fee and additional expenses is CHF 5400.

## 2. Decision

Based on these considerations

### decreed:

1. the above-mentioned clinical trial is authorized by Swissmedic.
2. the fee amounts to CHF 5400.

## 3. additional information

- The invoice for the fee will be sent to you by separate post.
- The Swissmedic reference number for the clinical trial is 10001035. **For future correspondence, please refer to this number.**
- Please note the notification and reporting obligations to Swissmedic that must be fulfilled during the trial (Articles 33 - 39 of the Ordinance on Clinical Trials with Medical Devices (ClinO-Mep; SR 810.306)):
  - Changes in the documentation or in the conduct of the trial
  - Serious incidents
  - Safety-relevant circumstances
  - Annual report on the safety of trial subjects (including date and list of all serious incidents considered in the report)
  - Termination or cancellation of the trial, final report

A summary can be found in the information sheet: (Information Sheet BW600\_00\_015e) Chapter 7 The notifications and reports must be submitted to Swissmedic unsolicited and on time. Sponsors of clinical trials are required by law to maintain a suitable quality assurance system. The handling of notification and reporting obligations and their due dates must be described in processes for clinical trials. Duty specifications and training of the persons involved must be reviewed and updated.

- Your first annual report to Swissmedic is due by **22 August 2023** at the latest. Please send us all the information in accordance with information sheet section 7.2.4. You can also submit the report earlier, e.g., for a coordinated submission to several authorities. However, a delay in submission is not permitted.

- In accordance with Articles 46 and 47 of the Ordinance on Clinical Trials in Human Research (ClinO, SR 810.305), Swissmedic is authorized to carry out inspections, revoke or suspend this authorization at any time, or make the continuation of the trial subject to additional conditions.

Kind regards

Swissmedic, Swiss Agency for Therapeutic Products

Saranya Subakaran Zentraler Versand / Envoi centralisé

**Your contact:**

Sector Market Surveillance

Division Medical Devices Clinical Investigations (MDCI)

Dr Einat Schmutz, [Einat.Schmutz@swissmedic.ch](mailto:Einat.Schmutz@swissmedic.ch)

Enclosure: Vote of the Ethics Committee

Copy:

- Cantonal ethics committee: Kantonale Ethikkommission Bern
- Cantonal authorities: Cantonal pharmacist

**Right of Appeal**

An appeal against this decision may be lodged within 30 days of notification. The appeal must be submitted to the Federal Administrative Court, P.O. Box, 9023 St. Gallen (Art. 31 and 33 letter e of the Federal Act of 17 June 2005 on the Federal Administrative Court; SR 173.32).

The appeal must contain the request, the grounds for the request, the evidence and the signature of the appellant (or the appellant's representative); the contested decision and the documents invoked as evidence must be enclosed (Art. 52 of the Federal Act of 20 December 1968 on Administrative Procedure; SR 172.021).

Translation of amendment ethical approval – for original version see below starting on page 12.

Murtenstrasse 31  
3010 Bern  
Bern  
+41 31 633 70 70 (Telefon)  
+41 31 633 70 71 (Telefax)  
info.kek@be.ch  
Ethikkommission für die Forschung am Menschen (be.ch)

Dorothy Pfiffner  
+41 31 633 70 77 [dorothy.pfiffner@be.ch](mailto:dorothy.pfiffner@be.ch)  
dorothy.pfiffner@be.ch

Frau  
Prof. Dr. phil. Stefanie J. Schmidt Klinische  
Psychologie des Kindes- und  
Jugendalters,  
Institut für Psychologie  
Fabrikstrasse 8  
3012 Bern

Bern, 26. October 2023, FN

## Provision Amendment of the Bern Ethics Committee

Substantial amendment: Protocol amendment 3

|                                                                       |                                                                                                                                               |
|-----------------------------------------------------------------------|-----------------------------------------------------------------------------------------------------------------------------------------------|
| <b>Project-ID (BASEC)</b>                                             | 2022-D0036                                                                                                                                    |
| <b>European Clinical Investigation Identification number (CIV ID)</b> |                                                                                                                                               |
| <b>Project title</b>                                                  | Randomized Controlled Trial on the Efficacy of a Transdiagnostic Online-Prevention Approach in Adolescents (EMPATIA)                          |
| <b>Coordinator</b>                                                    | Prof. Dr. phil. Stefanie J. Schmidt                                                                                                           |
| <b>Sponsor</b>                                                        | Universität Bern, Institut für Psychologie, Abteilung Klinische Psychologie des Kindes- und Jugendalters, Prof. Dr. phil. Stefanie J. Schmidt |
| <b>Main-Ethics committee</b>                                          | <b>Trial site</b>                                                                                                                             |
| Bern Ethics Committee                                                 | Prof. Dr. phil. Stefanie J. Schmidt, Institute of Psychology, Division of clinical child and adolescent psychology, University of Bern        |

### Decision

- The authorization is granted
- The authorization is granted with conditions
- The authorization is not granted

### Procedure

- Simplified procedure  Presidential procedure

The Ethics Committee confirms that it works in accordance with the Ordinance on Clinical Trials with Medical Devices (KlinV-Mep), the HRA Organization Ordinance (OV-HFG) and ICH-GCP.

## **Fees**

**Tariff code:** 3.3.1 **Amount:** CHF 250.

In accordance with the current swissethics scale of fees.

## **Right of appeal**

An appeal against this decision may be lodged with the Health, Social Affairs and Integration Directorate of the Canton of Bern within 30 days of notification. The appeal period may not be extended. The notice of appeal must be submitted in duplicate to the Health, Social Affairs and Integration Directorate, Rathausgasse 1, P.O. Box, 3000 Bern 8.

Any appeal, which must be submitted in at least two copies, must contain an application, a statement of facts and evidence, a statement of grounds and a signature; the contested decision and other tangible evidence must be enclosed. It must

(a) indicate which decision is requested instead of the contested decision and

(b) the grounds on which this other decision is requested and

(c) contain the signature of the appealing party or the person representing them.

The notice of appeal must be accompanied by the evidence, insofar as it is tangible, and the contested decision. (Art. 32 and 60 ff. of the Act of 23 May 1989 on the Administration of Administrative Justice [VRPG; BSG 155.21]).

## Copy to

Swissmedic (category C clinical trials only)

Sponsor (in Switzerland) University of Bern, stefanie.schmidt@unibe.ch

FOPH

Other

Prof. em. Dr. med. Christian Seiler  
President CEC Bern Dr. sc. nat.

Dorothy Pfiffner Vizepräsidentin  
Leiterin Wissenschaftliches Sekretariat

## Appendix:

- Decision and significance
- Documents submitted 05.10.2023

## Appendix

### Significance of the decision

**The authorisation is granted:** The project can be continued in accordance with the major change listed above.

### Documents submitted for the main centre

**Prof. Dr. phil. Stefanie J. Schmidt, Institute of Psychology, Division of clinical child and adolescent psychology, University of Bern**

| File                                                                  | category                                                                                      | date of doc. | version | submission date |
|-----------------------------------------------------------------------|-----------------------------------------------------------------------------------------------|--------------|---------|-----------------|
| <a href="#">cover-letter-amendment-231005.pdf</a>                     | 1. Cover Letter                                                                               | 05.08.2022   |         | 05.10.2023      |
| <a href="#">empatia-cip-v3-track.docx</a>                             | Art. 3 MDR / IVDR. Clinical investigation plan (CIP) / Clinical performance study plan (CPSP) | 05.10.2023   | 3       | 05.10.2023      |
| <a href="#">empatia-cip-v3-clean.pdf</a>                              | Art. 3 MDR / IVDR. Clinical investigation plan (CIP) / Clinical performance study plan (CPSP) | 05.10.2023   | 3       | 05.10.2023      |
| <a href="#">empatia-appendix1-case-report-form-v4-clean.pdf</a>       | Art. 3 MDR / IVDR. Case Report Form (CRF)                                                     | 05.10.2023   | 4       | 05.10.2023      |
| <a href="#">empatia-appendix1-case-report-form-v4-track.docx</a>      | Art. 3 MDR / IVDR. Case Report Form (CRF)                                                     | 05.10.2023   | 4       | 05.10.2023      |
| <a href="#">empatia-appendix2-icfadolescent-older14y-v4-clean.pdf</a> | Art. 4.4 MDR / IVDR. Patient information and declaration of consent                           | 05.10.2023   | 4       | 05.10.2023      |
| <a href="#">empatia-appendix2-icfparentyounger14y-v4-track.docx</a>   | Art. 4.4 MDR / IVDR. Patient information and declaration of consent                           | 05.10.2023   | 4       | 05.10.2023      |
| <a href="#">empatia-appendix2-icfparentyounger14y-v4-clean.pdf</a>    | Art. 4.4 MDR / IVDR. Patient information and declaration of consent                           | 05.10.2023   | 4       | 05.10.2023      |
| <a href="#">empatia-appendix2-icfparentolder14y-v4-track.docx</a>     | Art. 4.4 MDR / IVDR. Patient information and declaration of consent                           | 05.10.2023   | 4       | 05.10.2023      |

|                                                          |                                                                     |            |   |            |
|----------------------------------------------------------|---------------------------------------------------------------------|------------|---|------------|
| empatia-appendix2-icfparentolder14y-v4-clean.pdf         | Art. 4.4 MDR / IVDR. Patient information and declaration of consent | 05.10.2023 | 4 | 05.10.2023 |
| empatia-appendix2-icfadolescent-younger14y-v4-track.docx | Art. 4.4 MDR / IVDR. Patient information and declaration of consent | 05.10.2023 | 4 | 05.10.2023 |
| empatia-appendix2-icfadolescent-younger14y-v4-clean.pdf  | Art. 4.4 MDR / IVDR. Patient information and declaration of consent | 05.10.2023 | 4 | 05.10.2023 |
| empatia-appendix2-icfadolescent-older14y-v4-track.docx   | Art. 4.4 MDR / IVDR. Patient information and declaration of consent | 05.10.2023 | 4 | 05.10.2023 |

201.251473

EINSCHREIBEN  
Stefanie Schmidt  
Institute of Psychology, University of Bern  
Fabrikstrasse 8  
3012 Bern

Bern, 22. August 2022

## VERFÜGUNG

### Betreff: Bewilligung eines klinischen Versuchs<sup>1</sup> mit Medizinprodukten

Unsere Referenz (Reference to original application number): **102676067**

#### Identifikation des klinischen Versuchs

- 
- Titel: Randomized Controlled Trial on the Efficacy of a Transdiagnostic Online-Prevention Approach in Adolescents (EMPATIA)
  - Sponsor: Institute of Psychology, University of Bern
  - Referenznummer Swissmedic: 10001035
  - Referenznummer Ethikkommission: 2022-D0036
  - Referenznummer EUDAMED: CIV-22-04-039291

Sehr geehrte Damen und Herren

### 1. Erwägungen

Swissmedic trifft den Entscheid zur Bewilligung des Versuchs gemäss Artikel 54 vom Bundesgesetz über Arzneimittel und Medizinprodukte (HMG; SR 812.21), dem positiven Votum der zuständigen Ethikkommission (siehe Anhang) sowie den Auflagebestätigungen vom 10.08.2022 und 22.08.2022 und den bis und mit am 10.08.2022 bei Swissmedic eingegangenen Unterlagen und Informationen, insbesondere

- Prüfplan (CIP) Version 2 (09.06.2022)
- Datenerhebungsbogen (CRF) Version 3 (24.06.2022)
- Prüferinformation (Investigator's Brochure) Version 5 (05.08.2022)
- Aufklärungsbögen (Patient information) Version 3 (24.06.2022)

<sup>1</sup> Dieser Begriff umfasst Folgendes: Klinische Prüfungen mit Medizinprodukten, interventionelle Leistungsstudien mit IVD, kombinierte klinische Versuche mit Medizinprodukten und Arzneimitteln



## Gebühr

Die Gebühr wird in Anwendung der Verordnung des Schweizerischen Heilmittelinstituts über seine Gebühren (GebV-Swissmedic; SR 812.214.5) festgesetzt. Die Pauschalgebühr beträgt CHF 5000.-. Im Bewilligungsverfahren ist ein Zusatz-aufwand aufgrund mangelhafter Inhalte bzw. Änderungen an Dokumenten entstanden. Dieser ist durch die GebV-Swissmedic vorgesehene Pauschalgebühr nicht abgedeckt. Der Zusatzaufwand beträgt 2 Stunden und wird gestützt auf die GebV-Swissmedic mit einer Aufwandgebühr von CHF 200.-/Std. in Rechnung gestellt. Der Gesamtbetrag für Pauschalgebühr und Zusatzaufwand beträgt CHF 5400.-.

## 2. Entscheid

Gestützt auf diese Erwägungen wird

**verfügt:**

1. Der genannte klinische Versuch wird von Swissmedic bewilligt.
2. Die Gebühr beträgt CHF 5400.-.

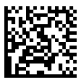

## 3. Zusatzinformationen

- Die Rechnung für die Gebühr wird Ihnen mit separater Post zugestellt.
- Die Swissmedic Referenznummer für den klinischen Versuch ist 10001035. **Bei zukünftiger Korrespondenz bitten wir Sie, auf diese Nummer Bezug zu nehmen.**
- Beachten Sie die Melde- und Berichterstattungspflichten gegenüber Swissmedic, die im Verlauf des Versuchs zu erfüllen sind (Artikel 33 - 39 der Verordnung über klinische Versuche mit Medizinprodukten (KlinV-Mep; SR 810.306):
  - Änderungen der Dokumentation oder in der Versuchsdurchführung
  - Schwerwiegende Vorkommnisse
  - Sicherheitsrelevante Umstände
  - Jährlicher Bericht über die Sicherheit der Versuchspersonen (einschliesslich Datum und Liste aller schwerwiegenden Vorkommnisse, die im Bericht berücksichtigt wurden)
  - Beendigung oder Abbruch des Versuchs, Schlussbericht

Eine Zusammenfassung finden Sie im Merkblatt: [\(Information Sheet BW600 00 015e\)](#) Kapitel 7. Die Meldungen und Berichterstattungen sind unaufgefordert und fristgerecht an Swissmedic einzureichen. Sponsoren von klinischen Versuchen sind von Gesetzes wegen zur Führung eines geeigneten Qualitätssicherungssystems verpflichtet. Die Handhabung der Melde- und Berichterstattungspflichten und ihrer Fälligkeiten ist in Prozessen für klinische Versuche zu beschreiben. Pflichtenhefte und Ausbildung der beteiligten Personen sind zu überprüfen und nachzuführen.

Verfügung (102676067)

- Ihr erster Jahresbericht an Swissmedic ist spätestens am **22. August 2023** fällig. Schicken Sie uns bitte alle Informationen gemäss Merkblatt Kapitel 7.2.4. Sie können den Bericht auch früher einreichen, z.B. für eine koordinierte Einreichung an mehrere Behörden. Eine Verzögerung der Einreichung ist hingegen nicht statthaft.
- Gemäss Artikel 46 und 47 der Verordnung über klinische Versuche in der Humanforschung (KlinV, SR 810.305) ist Swissmedic jederzeit dazu befugt, Inspektionen durchzuführen, diese Bewilligung zu widerrufen oder zu sistieren, oder die Weiterführung des Versuchs von zusätzlichen Auflagen abhängig zu machen.

Freundliche Grüsse

Swissmedic, Schweizerisches Heilmittelinstitut

Saranya Subakaran  
Zentraler Versand / Envoi centralisé

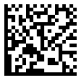

**Ihr Kontakt:**

Sector Market Surveillance,  
Division Medical Devices Clinical Investigations (MDCI)  
Dr. Einat Schmutz, Einat.Schmutz@swissmedic.ch

Beilage: Votum Ethikkommission

**Merkblatt auswählen:**

Link: [Information Sheet BW600\\_00\\_015e](#)

[https://www.swissmedic.ch/swissmedic/de/home.webcode.html?webcode=BW600\\_00\\_015e\\_MB](https://www.swissmedic.ch/swissmedic/de/home.webcode.html?webcode=BW600_00_015e_MB)

Kopie:

- Kantonale Ethikkommission: Kantonale Ethikkommission Bern
- Kantonale Behörde: Kantonsapotheker

### Rechtsmittelbelehrung

Gegen diese Verfügung kann innert 30 Tagen seit Zustellung Beschwerde erhoben werden. Die Beschwerde ist beim Bundesverwaltungsgericht, Postfach, 9023 St. Gallen, einzureichen (Art. 31 und 33 Buchstabe e des Bundesgesetzes vom 17. Juni 2005 über das Bundesverwaltungsgericht; SR 173.32).

Die Beschwerde hat die Begehren, deren Begründung mit Angabe der Beweismittel und die Unterschrift des Beschwerdeführers (oder der Beschwerdeführerin) oder der Vertretung zu enthalten; die angefochtene Verfügung und die als Beweismittel angerufenen Urkunden sind beizulegen (Art. 52 des Bundesgesetzes vom 20. Dezember 1968 über das Verwaltungsverfahren; SR 172.021).

---

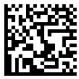

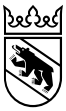

Gesundheits-, Sozial- und Integrationsdirektion  
Kantonale Ethikkommission für die Forschung

Murtenstrasse 31  
3010 Bern  
Bern  
+41 31 633 70 70 (Telefon)  
+41 31 633 70 71 (Telefax)  
info.kek@be.ch

[Ethikkommission für die Forschung am Menschen \(be.ch\)](https://www.be.ch/ethik)

Dorothy Pfiffner  
+41 31 633 70 77  
dorothy.pfiffner@be.ch

GSI-KEK, Murtenstrasse 31, 3010 Bern

Frau  
Prof. Dr. phil. Stefanie J. Schmidt  
Klinische Psychologie des Kindes- und  
Jugendalters,  
Institut für Psychologie  
Fabrikstrasse 8  
3012 Bern

Bern, 26. Oktober 2023, FN

## Verfügung Amendment der Ethikkommission Bern

### Wesentliche Änderung: Protokollamendment 3

|                                                                       |                                                                                                                                                     |
|-----------------------------------------------------------------------|-----------------------------------------------------------------------------------------------------------------------------------------------------|
| <b>Project-ID (BASEC)</b>                                             | 2022-D0036                                                                                                                                          |
| <b>European Clinical Investigation Identification number (CIV ID)</b> |                                                                                                                                                     |
| <b>Projekttitel</b>                                                   | Randomized Controlled Trial on the Efficacy of a Transdiagnostic Online-Prevention Approach in Adolescents (EMPATIA)                                |
| <b>Koordinierende Prüfperson</b>                                      | Prof. Dr. phil. Stefanie J. Schmidt                                                                                                                 |
| <b>Sponsor</b>                                                        | Universität Bern, Institut für Psychologie, Abteilung Klinische Psychologie des Kindes- und Jugendalters, Prof. Dr. phil. Stefanie J. Schmidt       |
| <b>Leit-Ethikkommission</b>                                           | <b>Durchführungsort</b>                                                                                                                             |
| Kantonale Ethikkommission<br>Bern                                     | Prof. Dr. phil. Stefanie J. Schmidt, Institut für Psychologie,<br>Abteilung Klinische Psychologie des Kindes- und<br>Jugendalters, Universität Bern |

### Entscheid

- Die Bewilligung wird erteilt
- Die Bewilligung wird mit Auflagen erteilt
- Die Bewilligung wird nicht erteilt

### Verfahren

- vereinfachtes Verfahren
- Präsidialverfahren

Die Ethikkommission bestätigt, dass sie nach der Verordnung über klinische Versuche mit Medizinprodukten (KlinV-Mep), der Organisationsverordnung HFG (OV-HFG) und nach ICH-GCP arbeitet.

## Gebühren

**Tarifcode:** 3.3.1                    **Betrag:** CHF 250.–  
Gemäss der geltenden Gebührenordnung von swissethics.

## Rechtsmittelbelehrung

Gegen diese Verfügung kann innert 30 Tagen seit Eröffnung bei der Gesundheits-, Sozial- und Integrationsdirektion des Kantons Bern Beschwerde erhoben werden. Die Beschwerdefrist kann nicht verlängert werden. Die Beschwerdeschrift ist im Doppel bei der Gesundheits-, Sozial- und Integrationsdirektion, Rathausgasse 1, Postfach, 3000 Bern 8 einzureichen.

Eine allfällige Beschwerde, die in mindesten zwei Exemplaren einzureichen ist, muss einen Antrag, die Angabe von Tatsachen und Beweismitteln, eine Begründung sowie eine Unterschrift enthalten; der angefochtene Entscheid und andere greifbare Beweismittel sind beizulegen.

Sie muss

- (a) angeben, welche Entscheidung anstelle der angefochtenen Verfügung beantragt wird und
- (b) aus welchen Gründen diese andere Entscheidung verlangt wird sowie
- (c) die Unterschrift der beschwerdeführenden Partei oder der sie vertretenden Person enthalten.

Der Beschwerdeschrift beizulegen sind die Beweismittel, soweit sie greifbar sind, und die angefochtene Verfügung. (Art. 32 und 60 ff. des Gesetzes vom 23. Mai 1989 über die Verwaltungsrechtspflege [VRPG; BSG 155.21]).

## Kopie an

- Swissmedic (nur klinische Versuche der Kategorie C)
- Sponsor (in der Schweiz)                    Universität Bern, stefanie.schmidt@unibe.ch
- BAG
- Andere

Prof. em. Dr. med. Christian Seiler  
Präsident KEK Bern

Dr. sc. nat. Dorothy Pfiffner  
Vizepräsidentin  
Leiterin Wissenschaftliches Sekretariat

**Anhang:**

- Entscheid und Bedeutung
- Eingereichte Dokumente 05.10.2023

## Anhang

### Bedeutung des Entscheids

**Die Bewilligung wird erteilt:** Das Vorhaben kann gemäss der oben aufgeführten wesentlichen Änderung weitergeführt werden.

### Eingereichte Dokumente für das Hauptzentrum

| <b>Prof. Dr. phil. Stefanie J. Schmidt, Institut für Psychologie, Abteilung Klinische Psychologie des Kindes- und Jugendalters, Universität Bern</b> |                                                                                               |              |         |                 |  |
|------------------------------------------------------------------------------------------------------------------------------------------------------|-----------------------------------------------------------------------------------------------|--------------|---------|-----------------|--|
| File                                                                                                                                                 | category                                                                                      | date of doc. | version | submission date |  |
| <a href="#">cover-letter-amendment-231005.pdf</a>                                                                                                    | 1. Cover Letter                                                                               | 05.08.2022   |         | 05.10.2023      |  |
| <a href="#">empatia-cip-v3-track.docx</a>                                                                                                            | Art. 3 MDR / IVDR. Clinical investigation plan (CIP) / Clinical performance study plan (CPSP) | 05.10.2023   | 3       | 05.10.2023      |  |
| <a href="#">empatia-cip-v3-clean.pdf</a>                                                                                                             | Art. 3 MDR / IVDR. Clinical investigation plan (CIP) / Clinical performance study plan (CPSP) | 05.10.2023   | 3       | 05.10.2023      |  |
| <a href="#">empatia-appendix1-case-report-form-v4-clean.pdf</a>                                                                                      | Art. 3 MDR / IVDR. Case Report Form (CRF)                                                     | 05.10.2023   | 4       | 05.10.2023      |  |
| <a href="#">empatia-appendix1-case-report-form-v4-track.docx</a>                                                                                     | Art. 3 MDR / IVDR. Case Report Form (CRF)                                                     | 05.10.2023   | 4       | 05.10.2023      |  |
| <a href="#">empatia-appendix2-icfadolescent-older14y-v4-clean.pdf</a>                                                                                | Art. 4.4 MDR / IVDR. Patient information and declaration of consent                           | 05.10.2023   | 4       | 05.10.2023      |  |
| <a href="#">empatia-appendix2-icfparentyounger14y-v4-track.docx</a>                                                                                  | Art. 4.4 MDR / IVDR. Patient information and declaration of consent                           | 05.10.2023   | 4       | 05.10.2023      |  |
| <a href="#">empatia-appendix2-icfparentyounger14y-v4-clean.pdf</a>                                                                                   | Art. 4.4 MDR / IVDR. Patient information and declaration of consent                           | 05.10.2023   | 4       | 05.10.2023      |  |
| <a href="#">empatia-appendix2-icfparentolder14y-v4-track.docx</a>                                                                                    | Art. 4.4 MDR / IVDR. Patient information and declaration of consent                           | 05.10.2023   | 4       | 05.10.2023      |  |

|                                                                          |                                                                     |            |   |            |
|--------------------------------------------------------------------------|---------------------------------------------------------------------|------------|---|------------|
| <a href="#">empatia-appendix2-icfparentolder14y-v4-clean.pdf</a>         | Art. 4.4 MDR / IVDR. Patient information and declaration of consent | 05.10.2023 | 4 | 05.10.2023 |
| <a href="#">empatia-appendix2-icfadolescent-younger14y-v4-track.docx</a> | Art. 4.4 MDR / IVDR. Patient information and declaration of consent | 05.10.2023 | 4 | 05.10.2023 |
| <a href="#">empatia-appendix2-icfadolescent-younger14y-v4-clean.pdf</a>  | Art. 4.4 MDR / IVDR. Patient information and declaration of consent | 05.10.2023 | 4 | 05.10.2023 |
| <a href="#">empatia-appendix2-icfadolescent-older14y-v4-track.docx</a>   | Art. 4.4 MDR / IVDR. Patient information and declaration of consent | 05.10.2023 | 4 | 05.10.2023 |
