# Supplementary material for: Efficacy of a transdiagnostic Internet prevention approach in adolescents (EMPATIA study): study protocol of a randomized controlled trial
Source: PubMed Central journal article supplement — Trials. 2024 Aug 8;25:530. doi: 10.1186/s13063-024-08241-3 (PMC11308397; doi:10.1186/s13063-024-08241-3), 2024-08-08
Supplement: 13063_2024_8241_MOESM3_ESM.pdf [file 13063_2024_8241_MOESM3_ESM.pdf]

Translation of original funding documentation – for original version see below starting on page 4.

Prof. Stefanie Schmidt

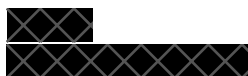

[www.snf.ch](http://www.snf.ch)

Wildhainweg 3, Postfach 8232, CH-3001 Bern

**Abteilung Karrieren Eccellenza**

+41 31 308 22 22

eccellenza @snf .ch

Bern, 14. November 2019

## **Disposition**

**Eccellenza contribution no.: PCEGP1-186913 / 1**

Dear Prof Schmidt

We are pleased to inform you that the Research Council has decided to support the project Understanding emerging psychopathology in adolescence: *Towards a transdiagnostic indicated prevention approach*. It has approved a research grant of **CHF 736,776** for this project. The SNSF will inform the university management about the award of the Eccellenza grant.

As a rule, the SNSF awards global budgets with fixed annual instalments for project funding. If your grant also includes your salary (incl. employer's social security contributions), the amount set for this cannot be used as project funding. Within the framework of the regulatory provisions and subject to the conditions set out in this ruling, you are free to decide how you allocate the funds of an annual instalment to the eligible costs. mySNF offers you support in managing your contribution. You can view and edit your budget online.

## **Allocated annual tranches in CHF**

| <b>Total</b>   | <b>1. Tranche</b> | <b>2. Tranche</b> | <b>3. Tranche</b> | <b>4. Tranche</b> | <b>5. Tranche</b> |
|----------------|-------------------|-------------------|-------------------|-------------------|-------------------|
| <b>736,776</b> | <b>137'456</b>    | <b>218'264</b>    | <b>171'711</b>    | <b>136'967</b>    | <b>72'378</b>     |

Start: 1. March 2020

Duration: 60 months

In the event of cuts in federal funding that affect the SNSF budget, reductions in the tranches cannot be ruled out.

## **Conditions:**

Please note that the SNSF will inform the press offices of the universities and higher education institutions directly about the awards of the SNSF Eccellenza grants on 27 November 2019 at 11:00 am. Until this time, an embargo on the publication of the results will apply.

### **Project-specific conditions**

The contribution will be reduced by CHF 80,000 for the following reason:

The declared aim of the collaboration with Prof Hornero from the University of Valladolid is to jointly analyze network data and further develop the network analysis approach. However, it was not possible to clarify conclusively in the interview what the CHF 80,000 requested under the heading "Third-party expenses" is needed for in detail. Furthermore, it was confirmed in the interview that these analyses, or their further development, represent an extension of the actual project anyway and are therefore not essential for the project applied for. You also confirmed that the analyses can also be carried out in Switzerland. Collaboration between your team and the University of Valladolid will continue to be made possible through the collaboration costs also applied for.

### **Staff positions**

Doctoral student, n.n., approved as requested

Doctoral student, n.n., approved as requested

Further employees, n.n., approved as requested

### **Please note the salary ranges and guidelines for employees in SNSF-funded projects:**

[https://www.snf.ch/SiteCollectionDocuments/Anhang\\_XII\\_Ausfuhrungsreglement\\_Beitragselement.pdf](https://www.snf.ch/SiteCollectionDocuments/Anhang_XII_Ausfuhrungsreglement_Beitragselement.pdf)

The contribution is included in the calculation of the total overhead grant, i.e. it is transferred to your institute to cover indirect research costs.

Please note that you are responsible for fulfilling the SNSF's open access obligation. This applies to all scientific publications resulting from the funding of this grant. They must be made available in digital form immediately or within the permitted embargo periods, free of charge and without restriction. See the Open Access website of the SNSF: <http://oa100.snf.ch>

### **Exclusion of liability for research projects involving human subjects**

The SNSF is not the initiator, within the meaning of Art. 19 para. 1 of the Federal Act on Research Involving Human Beings (Human Research Act, HRA), of the research projects with human subjects that it supports.

projects with human subjects. In particular, it is not a "sponsor" within the meaning of Art. 3 para. 2 of the Human Research Ordinance (HRO; SR 810.301) and within the meaning of Art. 2 let. c of the Clinical Trials Ordinance (ClinO; SR 810.305). The SNSF is therefore not liable for all damages incurred in connection with projects it supports.

### **Applicable legal basis**

The legal basis for this decision and the grant are the Regulations on the Award of SNSF Professorial Fellowships and SNSF Eccellenza Grants ([www.snf.ch](http://www.snf.ch) > Förderung > Karrieren > Eccellenza > Dokumente), the Grant Regulations ([www.snf.ch/br](http://www.snf.ch/br)) and the General Implementation Regulations for the Grant Regulations ([www.snf.ch/aar](http://www.snf.ch/aar)). These and other legal documents can also be found in mySNF under "Eingereichte Daten > Informationen/Dokumente" or under [www.snf.ch/downloads](http://www.snf.ch/downloads).

Inform any other persons involved in the project and also observe your duty to inform the SNSF.

Please note that you cannot postpone the start of the Eccellenza contract by more than 12 months.

If you find a position at a Swiss university, the research grant will in principle continue to run for the planned duration. It could be transferred to your new place of work if you change universities. The SNSF will make its decision on the basis of a proposal that you may submit to it after you have made your choice.

Further important information can be found in the appendix. We wish you every success in realizing your project.

Kind regards

*Signature*

Dr. Sönke Bauck

### **Right of appeal**

In accordance with Article 13 of the Federal Act of 14 December 2012 on the Promotion of Research and Innovation (SR 420.1), an appeal against this decision may be lodged with the Federal Administrative Court, P.O. Box, 9023 St. Gallen, within 30 days of the decision being issued. The notice of appeal must contain the requests, the grounds for the appeal, including the evidence and the signature of the appellant or the representative.

The contested decision and the documents invoked as evidence must be enclosed if the appellant has them in his or her possession.

### **Further information on your application and the next steps on mySNF**

You can find further information on the assessment of your application directly in mySNF. You can also view anonymized external assessments under "Documents > Anonymized assessments" (at the earliest two days after the date of this decision).

In addition, mySNF will also support you in the further steps for releasing and processing the grant. You can find comprehensive information on this in the Guidelines for the Lifetime Management of Research Requests (Contributions) ([www.snf.ch/lifetime](http://www.snf.ch/lifetime)).

Frau Prof. Stefanie Schmidt

XXXXXX

XXXXXXXXXXXXXX

Bern, 14. November 2019

**Verfügung****Eccellenza Beitrag Nr.: PCEGP1\_186913 / 1**

Sehr geehrte Frau Prof. Schmidt

Wir freuen uns, Ihnen mitzuteilen, dass der Forschungsrat beschlossen hat, das Projekt *Understanding emerging psychopathology in adolescence: Towards a transdiagnostic indicated prevention approach* zu unterstützen. Er bewilligt dafür einen Forschungsbeitrag von **CHF 736'776**. Die Universitätsleitung wird vom SNF über die Zusprache des Eccellenza Beitrages informiert.

Der SNF spricht in der Regel für Projektmittel Globalbudgets mit festgelegten Jahrestrenchen zu. Falls Ihr Beitrag auch Ihr Salär (inkl. Sozialabgaben des Arbeitgebers) enthält, kann die dafür festgelegte Summe nicht als Projektmittel verwendet werden. Sie sind im Rahmen der reglementarischen Bestimmungen und unter Berücksichtigung der in dieser Verfügung genannten Bedingungen frei, wie Sie die Mittel einer Jahrestranche auf die anrechenbaren Kosten verteilen. mySNF bietet Ihnen Unterstützung bei der Verwaltung Ihres Beitrages. Sie können Ihr Budget online einsehen und bearbeiten.

**Zugesprochene Jahrestrenchen in CHF**

| Total          | 1. Tranche     | 2. Tranche     | 3. Tranche     | 4. Tranche     | 5. Tranche    |
|----------------|----------------|----------------|----------------|----------------|---------------|
| <b>736'776</b> | <b>137'456</b> | <b>218'264</b> | <b>171'711</b> | <b>136'967</b> | <b>72'378</b> |

Beginn: 1. März 2020

Dauer: 60 Monate

Im Falle von Kürzungen der Bundesmittel, die das Budget des SNF tangieren, können Reduktionen bei den Tranchen nicht ausgeschlossen werden.

**Bedingungen:**

Wir machen Sie darauf aufmerksam, dass der SNF die Pressestellen der Universitäten und Hochschulen am 27. November 2019 um 11:00 Uhr direkt über die Zusprachen der SNSF Eccellenza Beiträge informieren wird. Bis zu diesem Zeitpunkt gilt ein Embargo für die Veröffentlichung der Ergebnisse.

**Projektspezifische Bedingungen**

Der Beitrag wird um CHF 80'000.- aus dem folgenden Grund gekürzt:

Das erklärte Ziel der Zusammenarbeit mit Prof. Hornero von der Universität Valladolid soll die gemeinsame Netzwerkdatenanalyse und Weiterentwicklung des Netzwerkanalyseansatzes sein. Im Interview konnte jedoch nicht abschliessend geklärt werden, wofür die beantragten CHF 80'000.- der Rubrik «Aufwendungen Dritter» im Einzelnen benötigt werden. Weiterhin wurde in dem Interview bestätigt, dass diese Analysen, bzw. deren Weiterentwicklung, ohnehin eine Erweiterung des eigentlichen Projektes darstellen und für das beantragte Projekt somit nicht essentiell sind. Sie haben ebenfalls bestätigt, dass die Analyse auch in der Schweiz durchgeführt werden kann. Eine Zusammenarbeit Ihres Teams mit der Universität Valladolid wird auch weiterhin über die ebenfalls beantragten Kollaborationskosten ermöglicht.

#### Stellen Mitarbeitende

Doktorand/in, n.n., bewilligt wie beantragt

Doktorand/in, n.n., bewilligt wie beantragt

weitere Mitarbeitende, n.n., bewilligt wie beantragt

#### **Bitte beachten Sie die Lohnbandbreiten, Richtlinien für Mitarbeitende in SNF unterstützten Projekten:**

[http://www.snf.ch/SiteCollectionDocuments/Anhang\\_XII\\_Ausfuhrungsreglement Beitragsgreglement.pdf](http://www.snf.ch/SiteCollectionDocuments/Anhang_XII_Ausfuhrungsreglement_Beitragsgreglement.pdf)

Der Beitrag wird in die Berechnung des Overhead-Gesamtbeitrags einbezogen, der Ihrer Institution zur Deckung von indirekten Forschungskosten überwiesen wird.

Wir weisen darauf hin, dass Sie die Verantwortung dafür tragen, die Open-Access-Verpflichtung des SNF zu erfüllen. Diese gilt für alle wissenschaftlichen Publikationen, die durch die Förderung dieses Beitrags entstehen. Sie müssen unmittelbar oder innerhalb der zulässigen Embargofristen, unentgeltlich und uneingeschränkt, auf digitalem Weg verfügbar gemacht werden. Siehe dazu die Open-Access-Webseite des SNF: <http://oa100.snf.ch>

#### **Ausschluss der Haftpflicht bei Forschungsprojekten mit Menschen**

Der SNF ist nicht «Veranlasser» im Sinne von Art. 19 Abs. 1 des Bundesgesetzes über die Forschung am Menschen (Humanforschungsgesetz, HFG) der von ihm unterstützten Forschungsprojekte mit Menschen. Er ist insbesondere kein «Sponsor» im Sinne von Art. 3 Abs. 2 der Humanforschungsverordnung, [HFV; SR 810.301](#)) und im Sinne von Art. 2 Bst. c der Verordnung über klinische Versuche; [KlinV; SR 810.305](#)). Der SNF haftet deshalb nicht für allfällige Schäden, die im Zusammenhang mit von ihm unterstützten Projekten entstehen.

#### **Geltende Rechtsgrundlagen**

Die Rechtsgrundlagen für den vorliegenden Entscheid und den Beitrag sind das [Reglement über die Gewährung von SNSF Professorial Fellowships und SNSF Eccellenza Grants](#) ([www.snf.ch/](http://www.snf.ch/) > Förderung > Karrieren > Eccellenza > Dokumente), das [Beitragsreglement](#) ([www.snf.ch/br](http://www.snf.ch/br)) und das [Allgemeine Ausführungsreglement zum Beitragsreglement](#) ([www.snf.ch/aar](http://www.snf.ch/aar)).

Diese und weitere Rechtsdokumente finden Sie auch in *mySNF* unter «Eingereichte Daten > Informationen/Dokumente» oder unter [www.snf.ch/downloads](http://www.snf.ch/downloads).

Schmidt Stefanie, Beitrag Nr. PCEGP1\_186913 / 1, Verfügung vom 14. November 2019

3/4

Informieren Sie allfällige weitere in das Vorhaben involvierte Personen und beachten Sie auch Ihre Informationspflicht gegenüber dem SNF.

Bitte beachten Sie, dass Sie den Beginn des Eccellenza Beitrages nicht um mehr als 12 Monate verschieben können.

Wenn Sie an einer schweizerischen Universität eine Stelle finden, läuft der Forschungsbeitrag während der vorgesehenen Dauer im Prinzip weiter. Er könnte an Ihren neuen Arbeitsort transferiert werden, falls Sie die Universität wechseln. Der SNF wird den Entscheid auf der Basis eines Vorschlags treffen, den Sie ihm gegebenenfalls nach Ihrer Wahl unterbreiten.

Weitere wichtige Informationen finden Sie im Anhang. Für die Realisierung Ihres Vorhabens wünschen wir Ihnen viel Erfolg.

Freundliche Grüsse

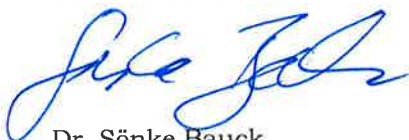

Dr. Sönke Bauck

Schmidt Stefanie, Beitrag Nr. PCEGP1\_186913 / 1, Verfügung vom 14. November 2019

4/4

### **Rechtsmittelbelehrung**

Gegen diese Verfügung kann gemäss Artikel 13 des Bundesgesetzes vom 14. Dezember 2012 über die Förderung der Forschung und der Innovation (SR 420.1) innerhalb von 30 Tagen nach Eröffnung Beschwerde beim Bundesverwaltungsgericht, Postfach, 9023 St. Gallen, eingereicht werden. Die Beschwerdeschrift hat die Begehren, deren Begründung mit Angabe der Beweismittel und die Unterschrift der Beschwerdeführerin bzw. des Beschwerdeführers oder der Vertreterin bzw. des Vertreters zu enthalten.

Die angefochtene Verfügung und die als Beweismittel angerufenen Urkunden sind beizulegen, soweit die Beschwerdeführerin bzw. der Beschwerdeführer sie in Händen hat.

### **Weitere Informationen zu Ihrem Gesuch und zum weiteren Vorgehen auf mySNF**

Weitere Angaben zur Beurteilung Ihres Gesuches finden Sie direkt in mySNF. Sie können unter «Dokumente > Anonymisierte Gutachten» auch anonymisierte externe Gutachten einsehen (frühestens zwei Tage nach dem Datum dieser Verfügung).

Zudem wird Sie mySNF auch bei den weiteren Schritten zur Beitragsfreigabe und -abwicklung unterstützen. Im Leitfaden für das Lifetime-Management von Forschungsgesuchen (Beiträgen) ([www.snf.ch/lifetime](http://www.snf.ch/lifetime)) finden Sie dazu umfassende Informationen.
