# Supplementary material for: Efficacy of a transdiagnostic Internet prevention approach in adolescents (EMPATIA study): study protocol of a randomized controlled trial
Source: PubMed Central journal article supplement — Trials. 2024 Aug 8;25:530. doi: 10.1186/s13063-024-08241-3 (PMC11308397; doi:10.1186/s13063-024-08241-3), 2024-08-08
Supplement: 13063_2024_8241_MOESM4_ESM.pdf [file 13063_2024_8241_MOESM4_ESM.pdf]

## Einwilligungserklärung als Informed Consent

### Schriftliche Einwilligungserklärung zur Teilnahme an einer Studie

- Bitte lies Dir dieses Formular sorgfältig durch.
- Bitte frage nach, wenn Du etwas nicht verstehst oder wissen möchtest.

|                                                                                             |                                                                                                                                                                                                              |
|---------------------------------------------------------------------------------------------|--------------------------------------------------------------------------------------------------------------------------------------------------------------------------------------------------------------|
| <b>BASEC-Nummer (nach Einreichung):</b>                                                     |                                                                                                                                                                                                              |
| <b>Titel der Studie<br/>(wissenschaftlich und Laiensprache):</b>                            | Randomized Controlled Trial on the Efficacy of a Transdiagnostic Online-Prevention Approach in Adolescents (EMPATIA-study).<br><br>Online-Programm zur Förderung der psychischen Gesundheit bei Jugendlichen |
| <b>verantwortliche Institution<br/>(Studienleitung mit Adresse):</b>                        | Universität Bern<br>Institut für Psychologie<br>Fabrikstrasse 8<br>3012 Bern                                                                                                                                 |
| <b>Ort der Durchführung:</b>                                                                | Universität Bern                                                                                                                                                                                             |
| <b>Leiter / Leiterin der Studie am Studienort:<br/>Name und Vorname in Druckbuchstaben:</b> | Prof. Dr. Stefanie Schmidt                                                                                                                                                                                   |
| <b>Teilnehmerin/Teilnehmer:</b>                                                             | Name und Vorname:<br><br>Geburtsdatum:<br><br><input type="checkbox"/> weiblich <input type="checkbox"/> männlich <input type="checkbox"/> divers                                                            |

- Ich wurde von der unterzeichnenden Studienleitung mündlich und schriftlich über den Zweck, den Ablauf der Studie, über mögliche Vor- und Nachteile sowie über eventuelle Risiken informiert.
- Ich erkläre mich einverstanden damit, dass meine Daten, welche im Rahmen der 12-Monatsbefragung der EMERGE-Studie bereits erfasst wurden, in dieser Studie wiederverwendet werden dürfen.
- Ich hatte genügend Zeit, meine Entscheidung zu treffen.
- Meine Fragen im Zusammenhang mit der Teilnahme an dieser Studie sind mir zufriedenstellend beantwortet worden.
- Ich kann die schriftliche Studieninformation behalten und erhalte eine Kopie meiner schriftlichen Einwilligungserklärung.
- Ich bin einverstanden, dass sowohl die zuständigen Fachleute des Sponsors (Universität Bern), von Swissmedic und der zuständigen Ethikkommission zu Prüf- und Kontrollzwecken in meine unverschlüsselten Daten Einsicht nehmen dürfen, jedoch unter strikter Einhaltung der Vertraulichkeit.
- Ich weiss, dass die gesundheitsbezogenen und persönlichen Daten nur in verschlüsselter Form zu Forschungszwecken für diese Studie weitergegeben werden können.

- Ich kann jederzeit und ohne Angabe von Gründen von der Studienteilnahme zurücktreten, ohne dass deswegen für mich Nachteile entstehen. Die bis zum Rücktritt erhobenen Daten und Proben werden noch im Rahmen der Studie ausgewertet.
- Ich bin mir bewusst, dass die in der Informationsschrift genannten Pflichten einzuhalten sind. Im Interesse meiner Gesundheit kann mich die Studienleitung jederzeit von der Studie ausschliessen.
- Ich bin mir bewusst, dass das Online-Programm zur Stärkung der Psychischen Gesundheit von Jugendlichen (EMPATIA) nicht CE-zertifiziert ist und erstmals von Menschen durchgeführt wird.
- Die Haftpflichtversicherung der Universität Bern kommt für allfällige Schäden auf.

|            |                                           |
|------------|-------------------------------------------|
| Ort, Datum | Name und Vorname der teilnehmenden Person |
|            | Unterschrift der teilnehmenden Person     |

**Bestätigung der Studienleiterin:** Hiermit bestätige ich, dass ich der/dem Teilnehmer/-in Wesen, Bedeutung und Tragweite der Studie erläutert habe. Ich versichere, alle im Zusammenhang mit dieser Studie stehenden Verpflichtungen gemäss dem geltenden Recht zu erfüllen. Sollte ich zu irgendeinem Zeitpunkt während der Durchführung der Studie von Aspekten erfahren, welche die Bereitschaft der Teilnehmerin/des Teilnehmers zur Teilnahme an der Studie beeinflussen könnten, werde ich den Angehörigen/die gesetzliche Vertretung/Eltern umgehend darüber informieren.

|            |                                                |
|------------|------------------------------------------------|
| Ort, Datum | Die Studienleiterin Prof. Dr. Stefanie Schmidt |
|            | Unterschrift der Studienleiterin               |

## Einwilligungserklärung (Informed Consent)

### Schriftliche Einwilligungserklärung zur Teilnahme an einem Studienprojekt

Bitte lesen Sie dieses Formular sorgfältig durch. Bitte fragen Sie, wenn Sie etwas nicht verstehen oder wissen möchten. Für die Teilnahme Ihres Kindes ist Ihre schriftliche Einwilligung notwendig.

|                                                    |                                                                                                                                                                                                              |
|----------------------------------------------------|--------------------------------------------------------------------------------------------------------------------------------------------------------------------------------------------------------------|
| <b>BASEC-Nummer:</b>                               | ID 2022-D0036                                                                                                                                                                                                |
| <b>Titel der Studie:</b>                           | Randomized Controlled Trial on the Efficacy of a Transdiagnostic Online-Prevention Approach in Adolescents (EMPATIA-study).<br><br>Online-Programm zur Förderung der psychischen Gesundheit bei Jugendlichen |
| <b>verantwortliche Institution:</b>                | Universität Bern<br>Institut für Psychologie<br>Fabrikstrasse 8<br>3012 Bern                                                                                                                                 |
| <b>Ort der Durchführung:</b>                       | Universität Bern                                                                                                                                                                                             |
| <b>Leiter / Leiterin der Studie am Studienort:</b> | Prof. Dr. Stefanie Schmidt                                                                                                                                                                                   |
| <b>Teilnehmerin/Teilnehmer:</b>                    | Name und Vorname:<br><br>Geburtsdatum:<br><br><input type="checkbox"/> weiblich <input type="checkbox"/> männlich <input type="checkbox"/> divers                                                            |

- Ich wurde als Eltern bzw. als Erziehungsberechtigte von oben genanntem Kind von der unterzeichnenden Studienleitung mündlich und schriftlich über den Zweck, den Ablauf der Studie, über mögliche Vor- und Nachteile sowie über eventuelle Risiken informiert.
- Ich erkläre mich einverstanden damit, dass die Daten meines Kindes, welche im Rahmen der 12-Monatsbefragung der EMERGE-Studie bereits erfasst wurden, in dieser Studie wiederverwendet werden dürfen.
- Ich bestätige, dass ich im Sinne meines Kindes entscheide, nämlich, dass es an dieser Studie teilnimmt. Stellvertretend für mein Kind akzeptiere ich die mündliche und schriftliche Information. Ich hatte genügend Zeit, diese Entscheidung zu treffen.
- Die Fragen im Zusammenhang mit der Teilnahme an dieser Studie sind mir beantwortet worden. Ich behalte die schriftliche Information und erhalte eine Kopie der schriftlichen Einwilligungserklärung.
- Ich bin einverstanden, dass sowohl die zuständigen Fachleute des Sponsors (Universität Bern), von Swissmedic und der zuständigen Ethikkommission zu Prüf- und Kontrollzwecken in meine unverschlüsselten Daten Einsicht nehmen dürfen, jedoch unter strikter Einhaltung der Vertraulichkeit.
- Ich weiss, dass die gesundheitsbezogenen und persönlichen Daten nur in verschlüsselter Form zu Forschungszwecken für diese Studie weitergegeben werden können.
- Ich kann stellvertretend für mein Kind jederzeit und ohne Angabe von Gründen von der Studienteilnahme zurücktreten, ohne dass deswegen für mich oder mein Kind Nachteile entstehen. Die bis zum Rücktritt erhobenen Daten und Proben werden noch im Rahmen der Studie ausgewertet.

- Ich bin mir bewusst, dass die in der Informationsschrift genannten Pflichten einzuhalten sind. Im Interesse der Gesundheit meines Kindes kann es die Studienleitung jederzeit von der Studie ausschliessen.
- Ich bin mir bewusst, dass das Online-Programm zur Stärkung der Psychischen Gesundheit von Jugendlichen (EMPATIA) nicht CE-zertifiziert ist und erstmals von Menschen durchgeführt wird.
- Die Haftpflichtversicherung der Universität Bern kommt für allfällige Schäden auf.

|            |                                                       |
|------------|-------------------------------------------------------|
| Ort, Datum | Name und Vorname des teilnehmenden Kindes             |
|            | Unterschrift Eltern/gesetzliche Vertretung des Kindes |

**Bestätigung der Studienleiterin:** Hiermit bestätige ich, dass ich den Eltern/der gesetzlichen Vertretung dieser Teilnehmerin/dieses Teilnehmers Wesen, Bedeutung und Tragweite der Studie erläutert habe. Ich versichere, alle im Zusammenhang mit dieser Studie stehenden Verpflichtungen gemäss dem geltenden Recht zu erfüllen. Sollte ich zu irgendeinem Zeitpunkt während der Durchführung der Studie von Aspekten erfahren, welche die Bereitschaft der Teilnehmerin/ des Teilnehmers zur Teilnahme an der Studie beeinflussen könnten, werde ich den Angehörigen/die gesetzliche Vertretung/Eltern umgehend darüber informieren.

|            |                                                |
|------------|------------------------------------------------|
| Ort, Datum | Die Studienleiterin Prof. Dr. Stefanie Schmidt |
|            | Unterschrift der Studienleiterin               |
